# Supplementary material for: Exploiting verdazyl radicals to assemble 2p–3d–4f one-dimensional chains
Source: Royal Society of Chemistry journal article supplement (doi:10.1039/c4dt03354j), 2015-01-01
Supplement: c4dt03354j1.pdf [file c4dt03354j1.pdf]

# Supporting Information

## Exploiting verdazyl radical to assemble 2p-3d-4f one-dimensional chains

Chao Wang,<sup>a</sup> Shuang-Yan Lin,<sup>a,b</sup> Wei Shi,<sup>c</sup> Peng Cheng<sup>c</sup> and Jinkui Tang<sup>\*a</sup>

<sup>a</sup> State Key Laboratory of Rare Earth Resource Utilization, Changchun Institute of Applied Chemistry, Chinese Academy of Sciences, Changchun 130022, P. R. China E-mail: [tang@ciac.ac.cn](mailto:tang@ciac.ac.cn)

<sup>b</sup> University of Chinese Academy of Sciences, Beijing, 100049, P. R. China

<sup>c</sup> Department of Chemistry, Key Laboratory of Advanced Energy Material Chemistry (MOE), and Tianjin Co-Innovation Center of Chemical Science and Engineering, Nankai University, Tianjin 300071, P. R. China.

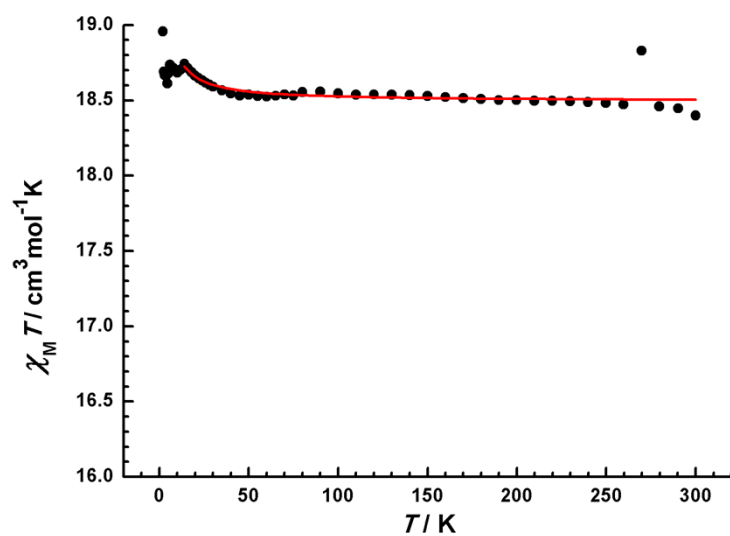

**Fig. S1**  $\chi_M T$  versus  $T$  plots of complex 1, the red curve is simulation of rough model with the parameters of  $g = 2.03$ ,  $J = 0.07(1) \text{ cm}^{-1}$ .

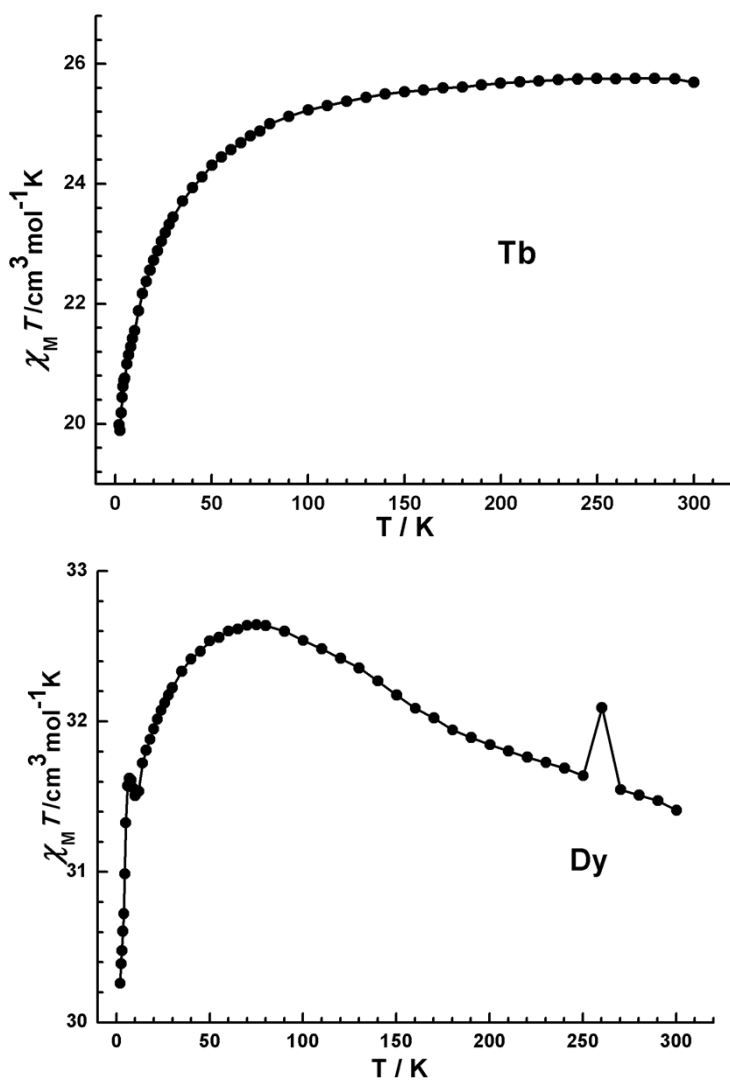

**Fig. S2** Temperature dependence of the  $dc$  susceptibilities for complexes 2 (top) and 3 (bottom) under 1000 Oe field.

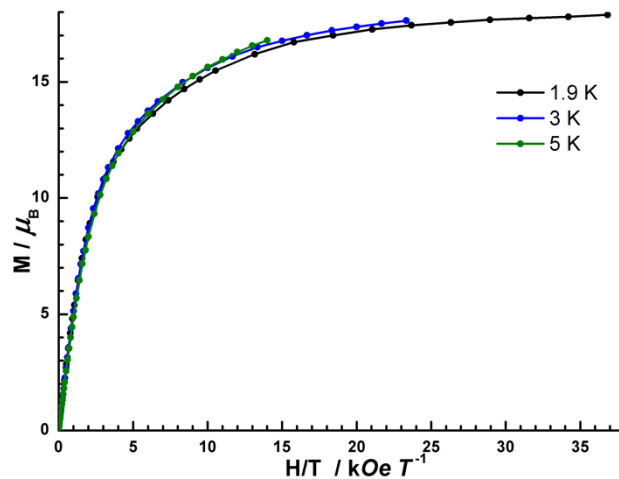

**Fig. S3**  $M$  versus  $H/T$  at temperature of 1.9, 3.0 and 5.0 K for complex **3**, respectively.

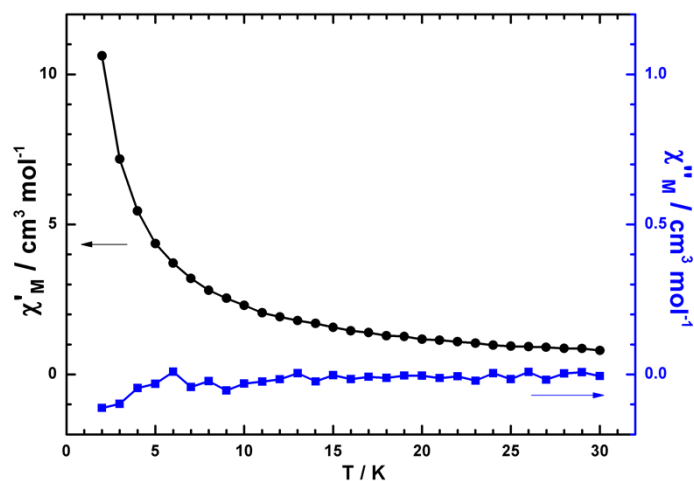

**Fig. S4** Temperature dependence of the in-phase ( $\chi'$  round points) and out-of-phase ( $\chi''$  square points) components of the alternating-current susceptibilities for complex **2** under zero  $dc$  field at the frequency of 1000 Hz.

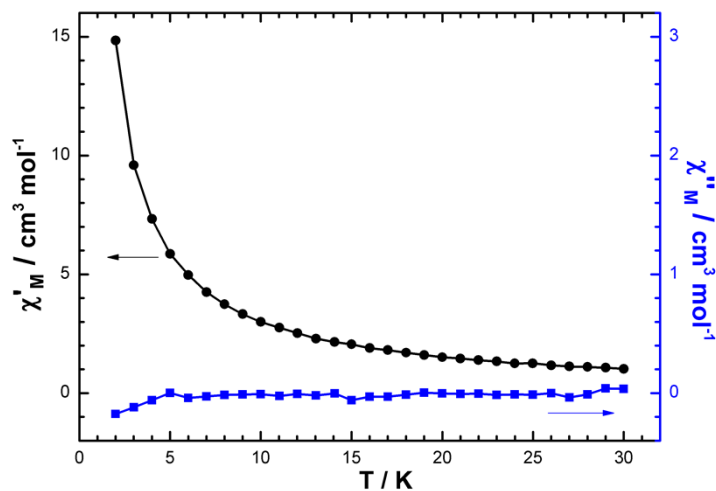

**Fig. S5** Temperature dependence of the in-phase ( $\chi'$  round points) and out-of-phase ( $\chi''$  square points) components of the alternating-current susceptibilities for complex **3** under zero  $dc$  field at the frequency of 1000 Hz.

**Table S1.** Selected bond lengths (Å) and angles (°) for complex **1**

|                   |            |                   |            |
|-------------------|------------|-------------------|------------|
| Cu(1)-N(10)       | 2.004(5)   | Cu(1)-N(9)        | 2.015(4)   |
| Cu(1)-O(11)       | 2.101(4)   | Cu(1)-O(13)       | 2.103(5)   |
| Cu(1)-O(12)       | 2.104(5)   | Cu(1)-O(14)       | 2.115(4)   |
| Cu(2)-O(2)        | 1.993(4)   | Cu(2)-O(3)        | 2.002(4)   |
| Cu(2)-N(20)       | 2.008(5)   | Cu(2)-N(19)       | 2.008(5)   |
| Cu(2)-O(4)        | 2.220(4)   | Cu(2)-O(1)        | 2.227(4)   |
| Gd(1)-O(22)       | 2.317(5)   | Gd(1)-O(19)       | 2.333(5)   |
| Gd(1)-O(21)       | 2.338(5)   | Gd(1)-O(17)       | 2.355(4)   |
| Gd(1)-O(18)       | 2.364(4)   | Gd(1)-O(15)       | 2.374(3)   |
| Gd(1)-O(20)       | 2.391(5)   | Gd(1)-O(16)       | 2.404(5)   |
| Gd(2)-O(5)        | 2.321(5)   | Gd(2)-O(6)        | 2.326(5)   |
| Gd(2)-O(23)       | 2.338(4)   | Gd(2)-O(9)        | 2.351(4)   |
| Gd(2)-O(24)       | 2.361(5)   | Gd(2)-O(8)        | 2.363(4)   |
| Gd(2)-O(7)        | 2.384(5)   | Gd(2)-O(10)       | 2.411(5)   |
| N(10)-Cu(1)-N(9)  | 177.14(19) | O(11)-Cu(1)-O(13) | 177.33(17) |
| O(12)-Cu(1)-O(14) | 178.62(17) | O(2)-Cu(2)-O(3)   | 179.58(17) |
| N(20)-Cu(2)-N(19) | 179.10(19) | O(4)-Cu(2)-O(1)   | 179.39(15) |
| O(22)-Gd(1)-O(19) | 147.30(20) | O(22)-Gd(1)-O(21) | 144.10(20) |
| O(19)-Gd(1)-O(21) | 68.50(20)  | O(22)-Gd(1)-O(17) | 76.89(18)  |
| O(19)-Gd(1)-O(17) | 126.08(18) | O(21)-Gd(1)-O(17) | 75.96(18)  |
| O(22)-Gd(1)-O(18) | 94.11(16)  | O(19)-Gd(1)-O(18) | 76.50(15)  |
| O(21)-Gd(1)-O(18) | 97.90(17)  | O(17)-Gd(1)-O(18) | 69.59(15)  |
| O(22)-Gd(1)-O(15) | 92.45(15)  | O(19)-Gd(1)-O(15) | 77.78(16)  |
| O(21)-Gd(1)-O(15) | 98.53(16)  | O(17)-Gd(1)-O(15) | 148.32(16) |
| O(18)-Gd(1)-O(15) | 141.69(15) | O(22)-Gd(1)-O(20) | 73.90(20)  |
| O(19)-Gd(1)-O(20) | 73.50(20)  | O(21)-Gd(1)-O(20) | 142.00(20) |
| O(17)-Gd(1)-O(20) | 129.58(17) | O(18)-Gd(1)-O(20) | 72.57(16)  |
| O(15)-Gd(1)-O(20) | 73.17(16)  | O(22)-Gd(1)-O(16) | 80.57(19)  |
| O(19)-Gd(1)-O(16) | 123.07(18) | O(21)-Gd(1)-O(16) | 71.66(19)  |
| O(17)-Gd(1)-O(16) | 79.05(16)  | O(18)-Gd(1)-O(16) | 148.57(15) |
| O(15)-Gd(1)-O(16) | 69.73(16)  | O(20)-Gd(1)-O(16) | 133.43(19) |
| O(5)-Gd(2)-O(6)   | 72.80(20)  | O(5)-Gd(2)-O(23)  | 71.90(20)  |
| O(6)-Gd(2)-O(23)  | 144.50(20) | O(5)-Gd(2)-O(9)   | 75.43(17)  |
| O(6)-Gd(2)-O(9)   | 77.02(16)  | O(23)-Gd(2)-O(9)  | 96.72(15)  |
| O(5)-Gd(2)-O(24)  | 142.54(19) | O(6)-Gd(2)-O(24)  | 70.30(20)  |
| O(23)-Gd(2)-O(24) | 145.15(17) | O(9)-Gd(2)-O(24)  | 90.27(15)  |
| O(5)-Gd(2)-O(8)   | 132.80(17) | O(6)-Gd(2)-O(8)   | 125.49(18) |
| O(5)-Gd(2)-O(8)   | 132.80(17) | O(6)-Gd(2)-O(8)   | 125.49(18) |
| O(23)-Gd(2)-O(8)  | 78.73(16)  | O(9)-Gd(2)-O(8)   | 145.33(16) |
| O(24)-Gd(2)-O(8)  | 76.34(15)  | O(5)-Gd(2)-O(7)   | 73.64(16)  |

|                  |            |                   |            |
|------------------|------------|-------------------|------------|
| O(6)-Gd(2)-O(7)  | 77.19(15)  | O(23)-Gd(2)-O(7)  | 90.23(15)  |
| O(9)-Gd(2)-O(7)  | 144.31(15) | O(24)-Gd(2)-O(7)  | 103.70(15) |
| O(8)-Gd(2)-O(7)  | 70.36(14)  | O(5)-Gd(2)-O(10)  | 130.70(19) |
| O(6)-Gd(2)-O(10) | 130.04(18) | O(23)-Gd(2)-O(10) | 77.53(17)  |
| O(9)-Gd(2)-O(10) | 70.81(16)  | O(24)-Gd(2)-O(10) | 72.68(18)  |
| O(8)-Gd(2)-O(10) | 74.67(15)  | O(7)-Gd(2)-O(10)  | 144.60(15) |

**Table S2.** Selected bond lengths (Å) and angles (°) for complex **2**

|                   |            |                   |            |
|-------------------|------------|-------------------|------------|
| Cu(1)-N(10)       | 1.999(6)   | Cu(1)-N(9)        | 2.014(6)   |
| Cu(1)-O(11)       | 2.101(4)   | Cu(1)-O(13)       | 2.161(6)   |
| Cu(1)-O(12)       | 2.038(5)   | Cu(1)-O(14)       | 2.049(5)   |
| Cu(2)-O(2)        | 1.994(5)   | Cu(2)-O(3)        | 1.999(5)   |
| Cu(2)-N(20)       | 2.014(6)   | Cu(2)-N(19)       | 2.003(6)   |
| Cu(2)-O(4)        | 2.231(4)   | Cu(2)-O(1)        | 2.238(4)   |
| Tb(1)-O(22)       | 2.308(5)   | Tb(1)-O(19)       | 2.331(6)   |
| Tb(1)-O(21)       | 2.341(5)   | Tb(1)-O(17)       | 2.359(5)   |
| Tb(1)-O(18)       | 2.340(5)   | Tb(1)-O(15)       | 2.350(4)   |
| Tb(1)-O(20)       | 2.383(5)   | Tb(1)-O(16)       | 2.382(5)   |
| Tb(2)-O(5)        | 2.321(5)   | Tb(2)-O(6)        | 2.311(6)   |
| Tb(2)-O(23)       | 2.328(5)   | Tb(2)-O(9)        | 2.322(5)   |
| Tb(2)-O(24)       | 2.364(4)   | Tb(2)-O(8)        | 2.333(5)   |
| Tb(2)-O(7)        | 2.369(5)   | Tb(2)-O(10)       | 2.383(6)   |
| N(10)-Cu(1)-N(9)  | 177.70(30) | O(11)-Cu(1)-O(13) | 177.50(20) |
| O(12)-Cu(1)-O(14) | 178.30(20) | O(2)-Cu(2)-O(3)   | 179.50(20) |
| N(20)-Cu(2)-N(19) | 178.90(20) | O(4)-Cu(2)-O(1)   | 178.40(17) |
| O(22)-Tb(1)-O(19) | 146.90(20) | O(22)-Tb(1)-O(18) | 95.35(18)  |
| O(19)-Tb(1)-O(18) | 77.87(19)  | O(22)-Tb(1)-O(21) | 143.60(20) |
| O(19)-Tb(1)-O(21) | 69.50(20)  | O(18)-Tb(1)-O(21) | 96.10(18)  |
| O(22)-Tb(1)-O(15) | 90.61(18)  | O(19)-Tb(1)-O(15) | 76.37(19)  |
| O(18)-Tb(1)-O(15) | 141.03(18) | O(21)-Tb(1)-O(15) | 101.61(18) |
| O(22)-Tb(1)-O(17) | 75.80(20)  | O(19)-Tb(1)-O(17) | 129.60(20) |
| O(18)-Tb(1)-O(17) | 70.97(18)  | O(21)-Tb(1)-O(17) | 75.54(18)  |
| O(15)-Tb(1)-O(17) | 147.16(18) | O(22)-Tb(1)-O(16) | 80.00(20)  |
| O(19)-Tb(1)-O(16) | 121.96(19) | O(18)-Tb(1)-O(16) | 148.46(18) |
| O(21)-Tb(1)-O(16) | 72.29(19)  | O(15)-Tb(1)-O(16) | 70.50(17)  |
| O(17)-Tb(1)-O(16) | 77.68(17)  | O(22)-Tb(1)-O(20) | 73.70(20)  |
| O(19)-Tb(1)-O(20) | 73.30(20)  | O(18)-Tb(1)-O(20) | 72.66(18)  |
| O(21)-Tb(1)-O(20) | 142.70(20) | O(15)-Tb(1)-O(20) | 72.22(17)  |
| O(17)-Tb(1)-O(20) | 129.30(17) | O(16)-Tb(1)-O(20) | 133.58(19) |
| O(6)-Tb(2)-O(9)   | 77.40(20)  | O(6)-Tb(2)-O(23)  | 145.42(19) |

|                   |            |                   |            |
|-------------------|------------|-------------------|------------|
| O(9)-Tb(2)-O(23)  | 96.32(18)  | O(6)-Tb(2)-O(8)   | 125.13(19) |
| O(9)-Tb(2)-O(8)   | 145.45(19) | O(23)-Tb(2)-O(8)  | 78.50(18)  |
| O(6)-Tb(2)-O(5)   | 73.10(20)  | O(9)-Tb(2)-O(5)   | 75.06(19)  |
| O(23)-Tb(2)-O(5)  | 72.40(20)  | O(8)-Tb(2)-O(5)   | 132.92(18) |
| O(8)-Tb(2)-O(5)   | 132.92(18) | O(6)-Tb(2)-O(24)  | 69.05(19)  |
| O(6)-Tb(2)-O(24)  | 69.05(19)  | O(9)-Tb(2)-O(24)  | 90.23(17)  |
| O(23)-Tb(2)-O(24) | 145.50(19) | O(8)-Tb(2)-O(24)  | 77.10(17)  |
| O(5)-Tb(2)-O(24)  | 141.60(20) | O(6)-Tb(2)-O(7)   | 76.94(19)  |
| O(9)-Tb(2)-O(7)   | 143.79(19) | O(23)-Tb(2)-O(7)  | 90.60(18)  |
| O(8)-Tb(2)-O(7)   | 70.76(18)  | O(5)-Tb(2)-O(7)   | 73.32(19)  |
| O(24)-Tb(2)-O(7)  | 103.82(18) | O(6)-Tb(2)-O(10)  | 128.75(19) |
| O(9)-Tb(2)-O(10)  | 71.20(19)  | O(23)-Tb(2)-O(10) | 78.54(19)  |
| O(8)-Tb(2)-O(10)  | 74.30(18)  | O(5)-Tb(2)-O(10)  | 132.10(20) |
| O(24)-Tb(2)-O(10) | 71.63(19)  | O(7)-Tb(2)-O(10)  | 144.83(18) |

**Table S3.** Selected bond lengths (Å) and angles (°) for complex **3**

|                   |            |                   |            |
|-------------------|------------|-------------------|------------|
| Cu(1)-N(10)       | 1.999(4)   | Cu(1)-N(9)        | 2.009(4)   |
| Cu(1)-O(11)       | 2.078(4)   | Cu(1)-O(13)       | 2.098(5)   |
| Cu(1)-O(12)       | 2.126(4)   | Cu(1)-O(14)       | 2.122(4)   |
| Cu(2)-O(2)        | 1.985(4)   | Cu(2)-O(3)        | 1.992(4)   |
| Cu(2)-N(20)       | 2.018(5)   | Cu(2)-N(19)       | 2.003(5)   |
| Cu(2)-O(4)        | 2.242(4)   | Cu(2)-O(1)        | 2.231(3)   |
| Dy(1)-O(22)       | 2.290(5)   | Dy(1)-O(19)       | 2.328(4)   |
| Dy(1)-O(21)       | 2.330(4)   | Dy(1)-O(17)       | 2.333(4)   |
| Dy(1)-O(18)       | 2.318(4)   | Dy(1)-O(15)       | 2.342(3)   |
| Dy(1)-O(20)       | 2.372(5)   | Dy(1)-O(16)       | 2.366(5)   |
| Dy(2)-O(5)        | 2.320(5)   | Dy(2)-O(6)        | 2.304(5)   |
| Dy(2)-O(23)       | 2.319(4)   | Dy(2)-O(9)        | 2.323(4)   |
| Dy(2)-O(24)       | 2.374(4)   | Dy(2)-O(8)        | 2.332(4)   |
| Dy(2)-O(7)        | 2.368(4)   | Dy(2)-O(10)       | 2.383(5)   |
| N(10)-Cu(1)-N(9)  | 177.16(18) | O(11)-Cu(1)-O(13) | 177.71(17) |
| O(12)-Cu(1)-O(14) | 179.18(16) | O(2)-Cu(2)-O(3)   | 179.80(16) |
| N(20)-Cu(2)-N(19) | 178.56(18) | O(4)-Cu(2)-O(1)   | 179.52(15) |
| O(22)-Dy(1)-O(18) | 93.33(16)  | O(22)-Dy(1)-O(19) | 147.00(20) |
| O(18)-Dy(1)-O(19) | 76.28(15)  | O(22)-Dy(1)-O(21) | 143.16(19) |
| O(18)-Dy(1)-O(21) | 99.07(17)  | O(19)-Dy(1)-O(21) | 69.90(20)  |
| O(22)-Dy(1)-O(17) | 76.70(17)  | O(18)-Dy(1)-O(17) | 71.00(15)  |
| O(19)-Dy(1)-O(17) | 126.52(17) | O(21)-Dy(1)-O(17) | 74.90(16)  |
| O(22)-Dy(1)-O(15) | 93.42(15)  | O(18)-Dy(1)-O(15) | 141.22(15) |
| O(19)-Dy(1)-O(15) | 77.43(15)  | O(21)-Dy(1)-O(15) | 98.04(15)  |

|                   |            |                   |            |
|-------------------|------------|-------------------|------------|
| O(17)-Dy(1)-O(15) | 147.48(15) | O(22)-Dy(1)-O(16) | 80.06(18)  |
| O(18)-Dy(1)-O(16) | 148.29(15) | O(19)-Dy(1)-O(16) | 124.41(18) |
| O(21)-Dy(1)-O(16) | 71.22(18)  | O(17)-Dy(1)-O(16) | 77.30(15)  |
| O(15)-Dy(1)-O(16) | 70.45(15)  | O(22)-Dy(1)-O(20) | 73.70(20)  |
| O(18)-Dy(1)-O(20) | 72.34(17)  | O(19)-Dy(1)-O(20) | 73.30(20)  |
| O(21)-Dy(1)-O(20) | 143.20(20) | O(17)-Dy(1)-O(20) | 130.66(16) |
| O(15)-Dy(1)-O(20) | 73.11(15)  | O(16)-Dy(1)-O(20) | 133.11(19) |
| O(6)-Dy(2)-O(23)  | 145.72(19) | O(6)-Dy(2)-O(5)   | 73.20(20)  |
| O(23)-Dy(2)-O(5)  | 72.69(18)  | O(6)-Dy(2)-O(9)   | 76.36(17)  |
| O(23)-Dy(2)-O(9)  | 97.77(15)  | O(5)-Dy(2)-O(9)   | 75.07(16)  |
| O(6)-Dy(2)-O(8)   | 125.50(17) | O(23)-Dy(2)-O(8)  | 77.89(15)  |
| O(5)-Dy(2)-O(8)   | 133.24(16) | O(9)-Dy(2)-O(8)   | 145.43(15) |
| O(6)-Dy(2)-O(7)   | 77.35(16)  | O(23)-Dy(2)-O(7)  | 90.02(14)  |
| O(5)-Dy(2)-O(7)   | 73.48(16)  | O(9)-Dy(2)-O(7)   | 143.57(15) |
| O(8)-Dy(2)-O(7)   | 71.00(14)  | O(6)-Dy(2)-O(24)  | 69.64(19)  |
| O(23)-Dy(2)-O(24) | 144.63(16) | O(5)-Dy(2)-O(24)  | 142.27(18) |
| O(9)-Dy(2)-O(24)  | 90.04(14)  | O(8)-Dy(2)-O(24)  | 76.36(14)  |
| O(7)-Dy(2)-O(24)  | 103.90(15) | O(6)-Dy(2)-O(10)  | 129.16(17) |
| O(23)-Dy(2)-O(10) | 77.76(15)  | O(5)-Dy(2)-O(10)  | 131.07(18) |
| O(9)-Dy(2)-O(10)  | 71.31(15)  | O(8)-Dy(2)-O(10)  | 74.28(14)  |
| O(7)-Dy(2)-O(10)  | 144.90(14) | O(24)-Dy(2)-O(10) | 72.22(16)  |

---
